# Supplementary material
Source: Springer Nature journal article supplement (https://www.springermedizin.de/resource/supplementary/12876_2010_556_MOESM3_ESM.pdf/9437248)

**A**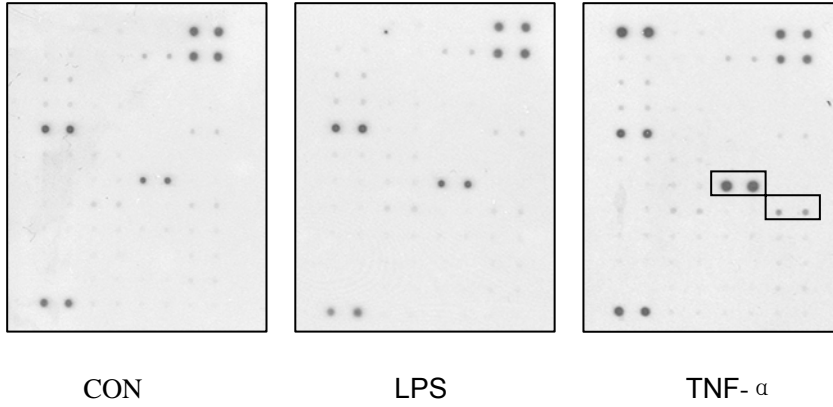**B**

Human Cytokine Antibody Array Map

|                |                |                |                |               |               |               |               |
|----------------|----------------|----------------|----------------|---------------|---------------|---------------|---------------|
| TNF- $\alpha$  | TNF- $\alpha$  | MCP-1          | MCP-1          | IL-2          | IL-2          | Pos           | Pos           |
| TNF- $\beta$   | TNF- $\beta$   | MCP-2          | MCP-2          | IL-3          | IL-3          | Pos           | Pos           |
| EGF            | EGF            | MCP-3          | MCP-3          | IL-4          | IL-4          | Neg           | Neg           |
| IGF-1          | IGF-1          | MCSF           | MCSF           | IL-5          | IL-5          | Neg           | Neg           |
| Angiogenin     | Angiogenin     | MDC            | MDC            | IL-6          | IL-6          | ENA-78        | ENA-78        |
| Oncostatin M   | Oncostatin M   | MIG            | MIG            | IL-7          | IL-7          | GCSF          | GCSF          |
| Thrombopoietin | Thrombopoietin | MIP-1 $\delta$ | MIP-1 $\delta$ | IL-8          | IL-8          | GM-CSF        | GM-CSF        |
| VEGF           | VEGF           | RANTES         | RANTES         | IL-10         | IL-10         | GRO           | GRO           |
| PDGF BB        | PDGF BB        | SCF            | SCF            | IL-12 p40p70  | IL-12 p40p70  | GRO- $\alpha$ | GRO- $\alpha$ |
| Leptin         | Leptin         | SDF-1          | SDF-1          | IL-13         | IL-13         | I-309         | I-309         |
| Neg            | Neg            | TARC           | TARC           | IL-15         | IL-15         | IL-1 $\alpha$ | IL-1 $\alpha$ |
| Pos            | Pos            | TGF- $\beta$ 1 | TGF- $\beta$ 1 | IFN- $\gamma$ | IFN- $\gamma$ | IL-1 $\beta$  | IL-1 $\beta$  |

**C**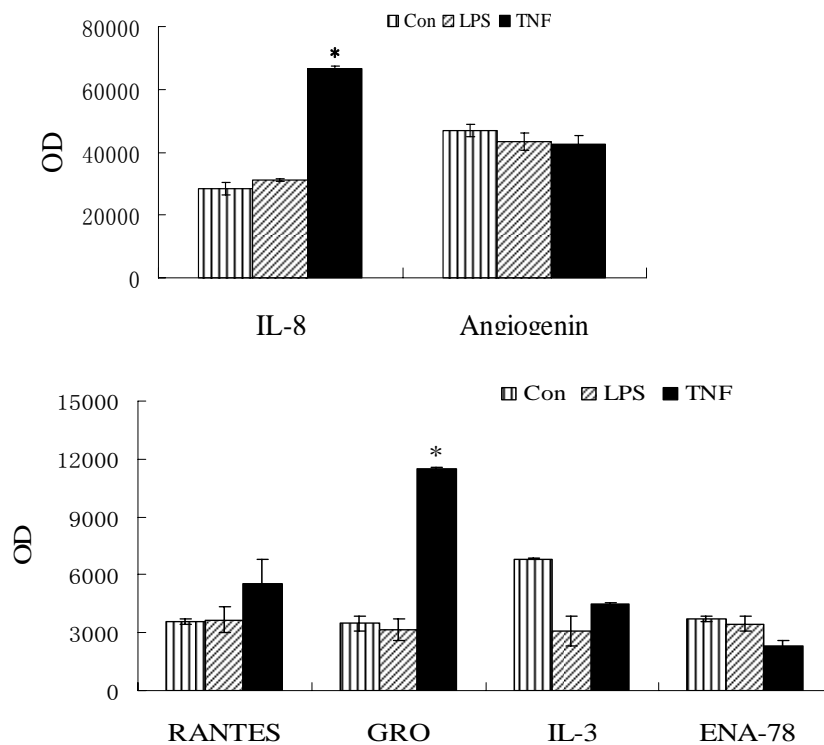

Supplement: MOESM3 [file 9437248]
